# Supplementary material for: Healthcare-associated COVID-19 across 3 pandemic waves: patient characterisation and validation of clinical definitions using genome sequencing
Source: Research Square preprint supplement (doi:10.21203/rs.3.rs-1285737/v1), 2022-01-28
Supplement: Supplementary file 1 [file 1d43222277bd0bd43a26decf.docx]

Supplementary data 2: Detailed description of different healthcare-associated COVID-19 clusters included in this study (ND – nosocomial definite / NP – nosocomial probable / NI – nosocomial indeterminate / HCW – healthcare worker)
