# Supplementary material for: Healthcare-associated COVID-19 across 3 pandemic waves: patient characterisation and validation of clinical definitions using genome sequencing
Source: Research Square preprint supplement (doi:10.21203/rs.3.rs-1285737/v1), 2022-01-28
Supplement: Supplementary file 2 [file 300449caae29c04c51c12f1e.docx]

Supplementary data 1: Detailed information on included genomes
